# Supplementary material
Source: Springer Nature journal article supplement (https://www.springermedizin.de/resource/supplementary/12887_2010_435_MOESM3_ESM.pdf/9475138)

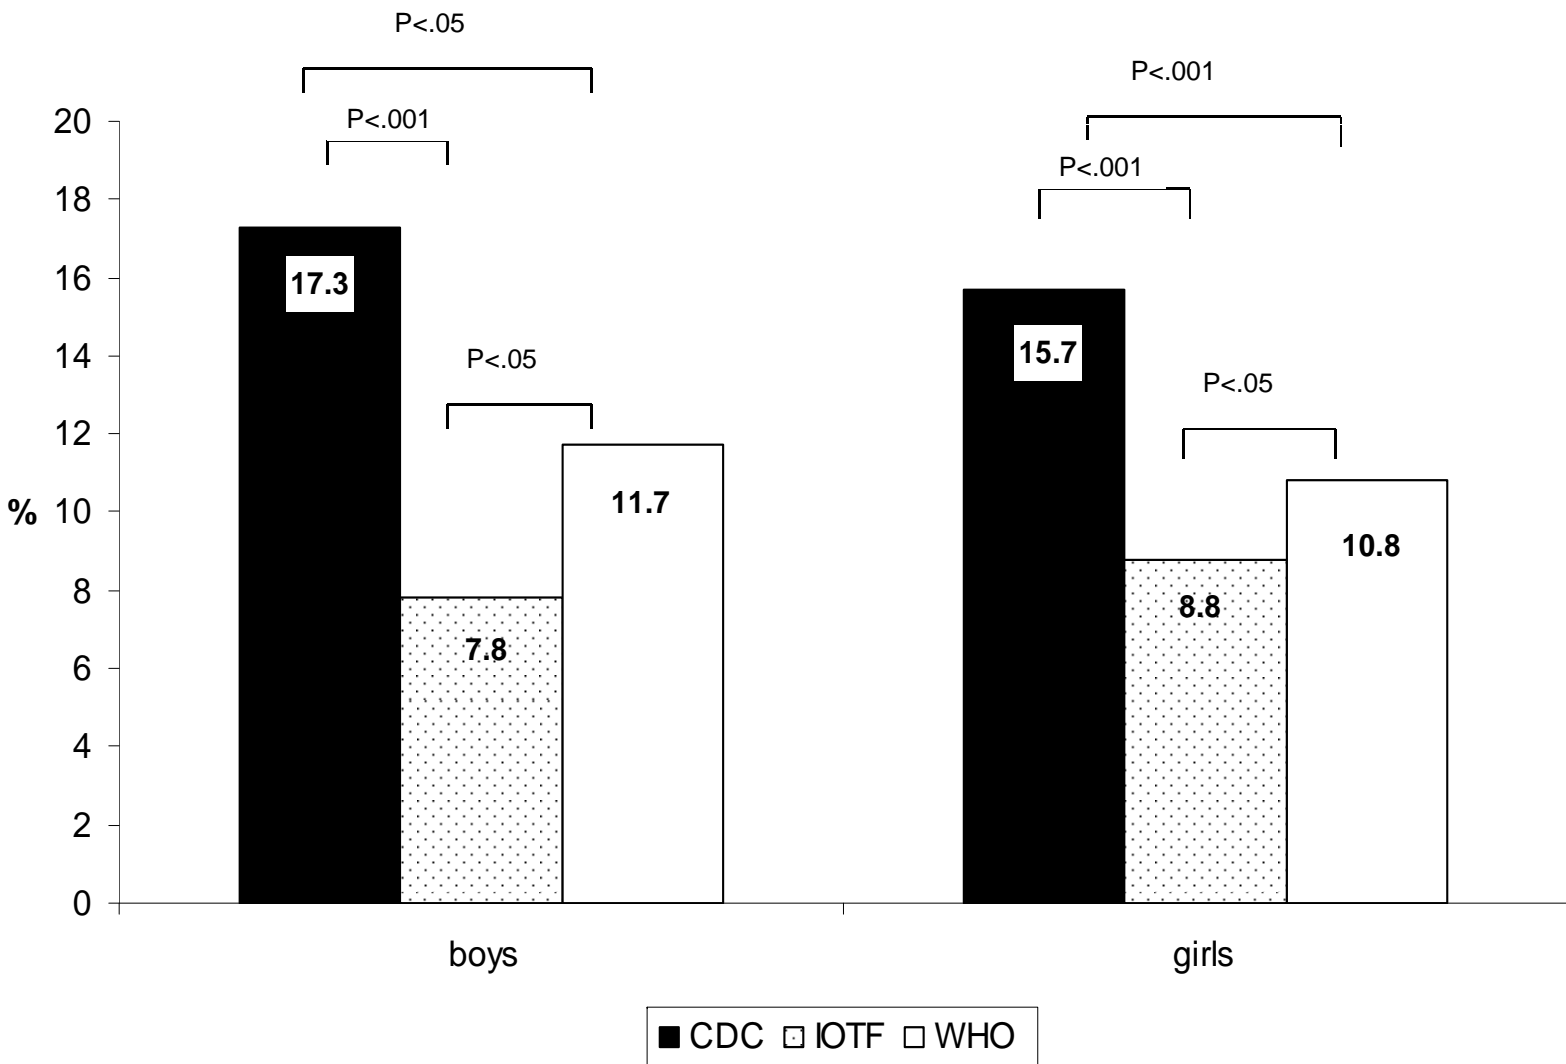

Supplement: MOESM3 [file 9475138]
